# Supplementary figures and images for: A Novel Colorimetric Nano Aptasensor for Ultrasensitive Detection of Aflatoxin B1 Based on the Exonuclease III-Assisted Signal Amplification Approach
Source: MDPI journal article supplement (doi:10.3390/foods10112568), 2021-10-25

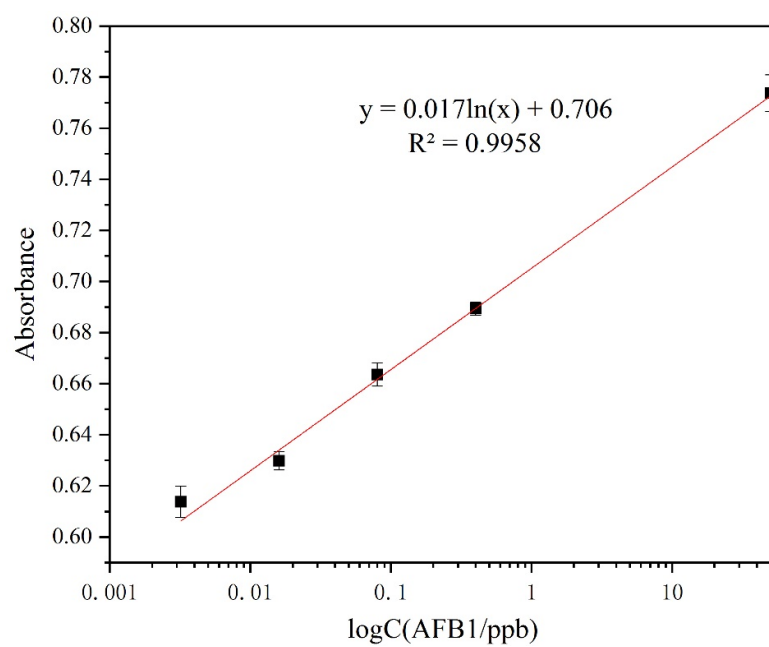

**Figure S1.** Extract-calibrated detection curve.

Supplement: s1 [file s1]
